# Supplementary material for: Beta Caryophyllene-Loaded Nanostructured Lipid Carriers for Topical Management of Skin Disorders: Statistical Optimization, In Vitro and Dermatokinetic Evaluation
Source: MDPI journal article supplement (doi:10.3390/gels9070550), 2023-07-06
Supplement: s1 [file s1]

## Article

# Beta Caryophyllene-Loaded Nanostructured Lipid Carriers for Topical Management of Skin Disorders: Statistical Optimization, In Vitro and Dermatokinetic Evaluation

Mohammed Ghazwani <sup>1,\*</sup>, Umme Hani <sup>1</sup>, Mohammed H. Alqarni <sup>2</sup> and Aftab Alam <sup>2</sup>

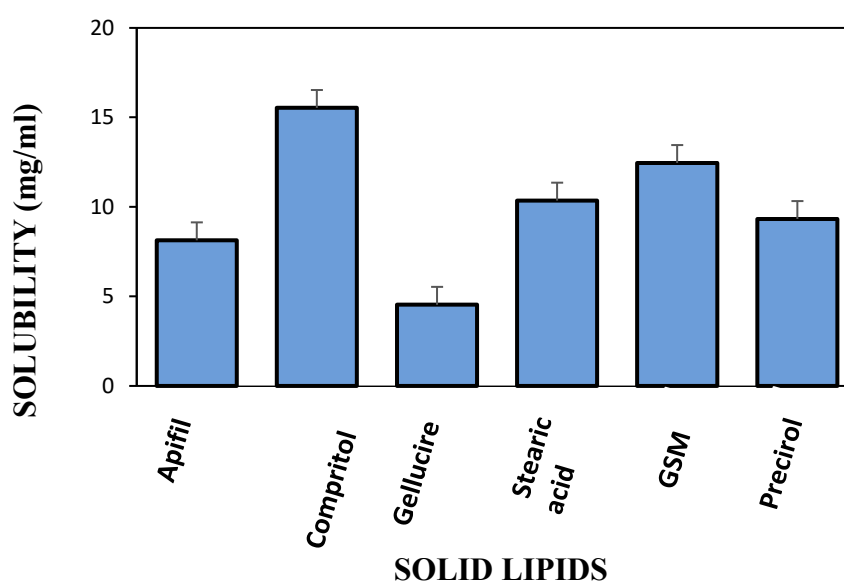

**Figure S1.** Solubilization of BCP in various Solid lipids. The data is statistically significant with P-value less than 0.005.

**Table S1.** Solubility of BCP in Solid lipids.

| Code | Components       | Solubility (mg/ml) |
|------|------------------|--------------------|
| A1   | Apifil           | 8.13 ± 1.45        |
| A2   | Compritol 888ATO | 15.53 ± 2.26       |
| A3   | Gellucire        | 4.53 ± 0.73        |
| A4   | Stearic acid     | 10.35 ± 2.01       |
| A5   | GSM              | 12.45 ± 2.84       |
| A5   | Precirol ATO5    | 9.32 ± 1.21        |

**Table S2.** Solubilization of BCP in liquid lipids.

| Code | Components    | Solubility (mg/ml) |
|------|---------------|--------------------|
| C1   | Oleic acid    | 12.74 ± 1.32       |
| C2   | Castor oil    | 7.12 ± 0.83        |
| C3   | Linseed oil   | 14.89 ± 1.52       |
| C4   | Olive oil     | 5.27 ± 0.38        |
| C5   | Soya Bean oil | 6.63 ± 0.62        |

**Table S3.** Particle size and PDI of nanoparticles with different surfactant.

| Batches | Surfactant | Particle size (nm) | PDI          |
|---------|------------|--------------------|--------------|
| F1      | Tween 20   | 243 ± 12           | 0.329 ± 0.13 |
| F2      | Tween 60   | 238 ± 10           | 0.311 ± 0.11 |
| F3      | Tween 80   | 210 ± 8            | 0.263 ± 0.08 |
| F4      | Span 20    | 285 ± 14           | 0.653 ± 0.23 |
| F5      | Span 60    | 279 ± 12           | 0.621 ± 0.26 |
| F6      | Span 80    | 289 ± 13           | 0.553 ± 0.18 |

**Table S4.** Observed responses in BBD software for the optimization of BCP-NLC formulation and summary of results of regression analysis for responses Y1 and Y2 for fitting to quadratic model.

| Runs                       | Independent Variables |                               |                                | Dependent Variables |                |
|----------------------------|-----------------------|-------------------------------|--------------------------------|---------------------|----------------|
|                            | A                     | B                             | C                              | Y <sub>1</sub>      | Y <sub>2</sub> |
| 1                          | 150                   | 30                            | 4                              | 253.41              | 78.13          |
| 2                          | 120                   | 40                            | 6                              | 216.56              | 78.16          |
| 3                          | 90                    | 40                            | 5                              | 239.48              | 75.68          |
| 4                          | 120                   | 20                            | 6                              | 220.14              | 77.47          |
| 5                          | 150                   | 20                            | 5                              | 260.23              | 79.64          |
| 6                          | 120                   | 30                            | 5                              | 210.86              | 86.74          |
| 7                          | 90                    | 30                            | 6                              | 232.14              | 74.58          |
| 8                          | 150                   | 30                            | 6                              | 246.85              | 80.35          |
| 9                          | 120                   | 30                            | 5                              | 211.52              | 86.25          |
| 10                         | 120                   | 30                            | 5                              | 212.14              | 86.01          |
| 11                         | 90                    | 30                            | 4                              | 238.84              | 74.95          |
| 12                         | 90                    | 20                            | 5                              | 241.31              | 75.85          |
| 13                         | 120                   | 30                            | 5                              | 212.54              | 85.87          |
| 14                         | 150                   | 40                            | 5                              | 251.65              | 78.98          |
| 15                         | 120                   | 30                            | 5                              | 211.33              | 85.95          |
| 16                         | 120                   | 20                            | 4                              | 215.65              | 75.64          |
| 17                         | 120                   | 40                            | 4                              | 213.52              | 79.24          |
| <i>Quadratic model</i>     | <i>R<sup>2</sup></i>  | <i>Adjusted R<sup>2</sup></i> | <i>Predicted R<sup>2</sup></i> | <i>SD</i>           | <i>C.V. %</i>  |
| Response (Y <sub>1</sub> ) | 0.9880                | 0.9726                        | 0.8135                         | 2.90                | 1.27           |
| Response (Y <sub>2</sub> ) | 0.9862                | 0.9684                        | 0.8017                         | 0.79                | 0.99           |

A= Lipid concentration (mg), B= Surfactant concentration (mg), C= Sonication Time, Y1= Particle size (nm), Y2= Entrapment efficient (%)

**Table S5.** Box Behnken Design (BBD) independent and dependent variables for the development and optimization of BCP-NLC.

| Variables                                 | Levels Used |            |           |
|-------------------------------------------|-------------|------------|-----------|
|                                           | Low (-1)    | Medium (0) | High (+1) |
| <i>Independent Variables</i>              |             |            |           |
| A= Lipid Concentration (mg)               | 90          | 120        | 150       |
| B= Surfactant Concentration (mg)          | 20          | 30         | 40        |
| C= Sonication Time (Min)                  | 4           | 5          | 6         |
| <i>Dependent Variables</i>                |             |            |           |
| Y <sub>1</sub> = Particle size (nm)       | Minimum     |            |           |
| Y <sub>2</sub> = Entrapment efficient (%) | Maximum     |            |           |
